# Supplementary material
Source: publisher figshare collection journal article supplement (https://acs.figshare.com/ndownloader/files/27536872)
Supplement: Supplementary file 1 [file 27536872]

## Sheet: Sheet1
Compound	Dual point								Cytotoxicity		IC50								EIA
	EG				LG				HepG2		ASEX				EG		LG
	1 µM		5 µM		1 µM		5 µM		2 µM		NF54		K1						% inhibition
	% inhibition	SD	% inhibition	SD	% inhibition	SD	% inhibition	SD	% Cytoxicity	SD	IC50 (nM)	SEM	IC50 (nM)	SEM	IC50 (nM)	SEM	IC50 (nM)	SEM
12	29.8394	16.6853	9.36714	16.2244	0	0	27.8214	3.52786	-14.387	5.10084	807.2	85.5	7278.65	1099.95
13											1882.95	25.75	>10000	0
14	3.43347	29.5396	0	9.85611	0	1.19818	34.0693	1.52171			568.55	120.55	773.55	52.55
15	1.09273	8.33593	43.8875	11.1928	34.1913	9.77605	37.0988	6.70499			232.45	23.85	425.1	8.7
16	2.90436	9.65702	32.3879	2.12041	34.57	2.50568	31.8614	6.97845			867.55	6.75	1626.95	105.15
17	19.5022	24.2882	23.332	13.0448	8.99663	1.02842	34.7104	2.16656	-14.0719	2.61497	470.65	24.55	1977.75	292.65
18	38.1961	18.3099	43.9861	11.961	4.33663	4.53865	20.9729	0.650571	-7.21974	1.76173	375.65	13.45	768.45	75.55
19	47.2313	33.9988	68.9066	10.6891	19.2203	1.55569	43.0833	8.35461	-17.7737	0.808338	999.55	138.65	669.4	85.5	1458	61
20	38.7972	7.64372	97.9468	0.20577	15.3771	2.46227	52.0374	1.44298	-19.4277	0.972093	653.25	72.45	463.85	26.75
21	18.7399	6.23942	96.3737	1.16954	0.384128	0.44602	21.7693	2.34315	-20.0578	0.56977	869.75	57.05	835.3	232.4
22	34.1491	15.3692	47.8462	13.5599	30.7779	0.882361	45.0409	1.77622	-14.6233	4.53291	389.7	54	1689.85	84.25
23	35.5436	18.3273	41.4801	10.7828	1.51869	2.63044	23.7446	4.31163	-12.3655	6.80769	479.15	0.35	879.15	15.25
24	70.9275	15.6442	93.1631	1.85173	34.7768	14.3197	56.1336	4.82392	-18.1675	0.474748	445.95	23.95	136.25	12.15	882.6	64.7			17
25	91.4061	1.92431	97.0606	0.144866	41.1798	2.97275	61.9407	3.23195	-11.0265	4.41412	194.35	18.55	59.8	10.6	115.2	17.8			7
26	18.4861	4.77107	89.8808	2.45156	1.42248	2.01168	42.8633	1.73833	-18.8501	0.327907	2889.45	76.25	944.15	238.55
27	33.073	19.0347	58.6583	11.6344	22.1278	5.03087	39.405	4.10833	-9.76634	1.22776	681.25	2.75	1957.8	248.6
28	12.4542	15.1039	15.2695	14.4334	29.724	5.4735	36.6496	5.54428			640.9	58.1	1283.1	232.7
29	65.3466	16.9667	90.5611	2.69583	10.625	14.4958	57.5599	8.69189	-19.3489	1.66395	361.05	37.45	182.75	29.25	2239	227			57
30	81.2457	1.78665	96.8757	0.640565	31.2854	10.3513	58.1954	0.648404	-19.1126	0.819769	553.45	99.25	214.85	34.25
31	14.4255	3.23914	24.0487	2.47663	36.4442	3.86685	39.1784	4.39548			2270.1	109.2	1327.6	240.8
32	30.8999	23.4504	95.3112	0.357753	0.630987	2.94859	14.1169	3.79479			780	55	307	-83	996.07	331.29
33	45.7027	10.4045	96.5803	0.113591	0	1.02653	62.5911	2.74778			403	-20	233	-70	928.6	332.6
34	69.8784	9.61722	89.6372	0.382235	0.230474	3.02498	10.2273	2.06223			156	-4	59	14	56.08	6.11	1899		15.4
35	66.7653	8.9909	90.987	0.257318	2.4776	0.525721	8.06661	0.703915			286	57.1	117	29	435.45	189.28	>5000		16.7
36	44.4994	15.7164	92.8922	0.345899	0	1.90403	0	0.625235			286	-72	65	-12	598.7	157.9
37	74.5642	7.05134	90.6709	0.301019	0.83547	1.13019	10.6306	2.11233			169	1	190	-82	97.62	13.34	>5000		2.5
38	7.31658	4.33877	59.8987	2.5145	0	3.81949	1.03714	4.41234			1849	33	384	30	3065.7	905.7
39	86.0924	7.33253	94.0332	0.314532	5.07044	1.50692	24.3093	0.733976			262	17	135	-36	219.43	106.83	2334		27.8
40	60.6374	7.12409	96.3964	0.127589	0	2.93346	73.0921	8.7718			257	7	159	-49	528.32	89.23
41	62.7199	3.70113	91.5403	0.661911	0	2.35955	0	4.04276			194	11	80	24	466.85	113.68	>5000		46.3
42	14.3494	6.83923	70.9384	3.43696	0	4.42418	1.81499	6.235			197	9	93	20	692.13	165.84
43	0	22.3063	47.2749	7.95065	30.9884	4.17916	39.6662	2.11787			207	-8	793	-20
44	0	12.0771	23.6268	13.5023	22.0539	20.1383	31.2195	8.86933			304	78	887	-49
45	0	70.0866	0	12.1192	0	0	0	0			276	-20	630	-6
46	30.7776	4.9787	56.6523	0.736587	0	0	0	0			83	30	255	-62
47	0	70.0318	31.0098	13.7629	0	0	0	0			263	11	836	1
48	0	12.5809	35.1751	9.77626	0	0	0	0			250	11	788	12
49	0	24.5682	16.8697	2.6073	0	0	0	0			262	-1	538	-62
50	0	6.45618	0	17.7476	0	0	0	0			150	22	280	-61
51	0	19.9654	0	9.29577	0	0	0	0			228	21	408	-108
52	19.9337	7.33936	37.8832	10.9809	0	0	0	0			5470	530
